# Supplementary material for: Chronic stress impairs autoinhibition in neurons of the locus coeruleus to increase asparagine endopeptidase activity
Source: eLife journal article supplement (doi:10.7554/elife.106362), 2025-05-12
Supplement: fig5-data2 [file elife-106362-fig5-data2-v1.pdf]

# Figure 5

A

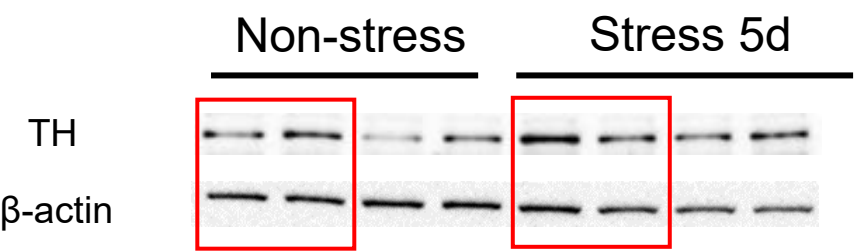

The highlighted images are shown in the figure.

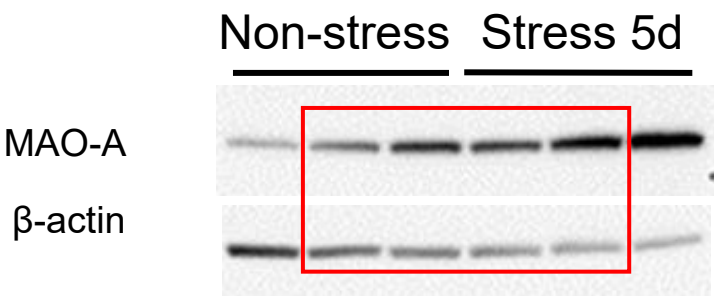

The highlighted images are shown in the figure.

D

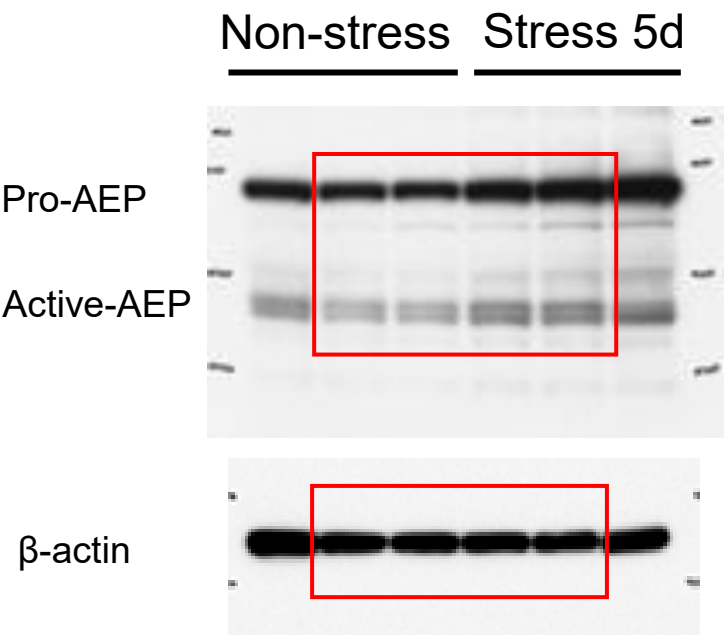

The highlighted images are shown in the figure.

Figure 5

G

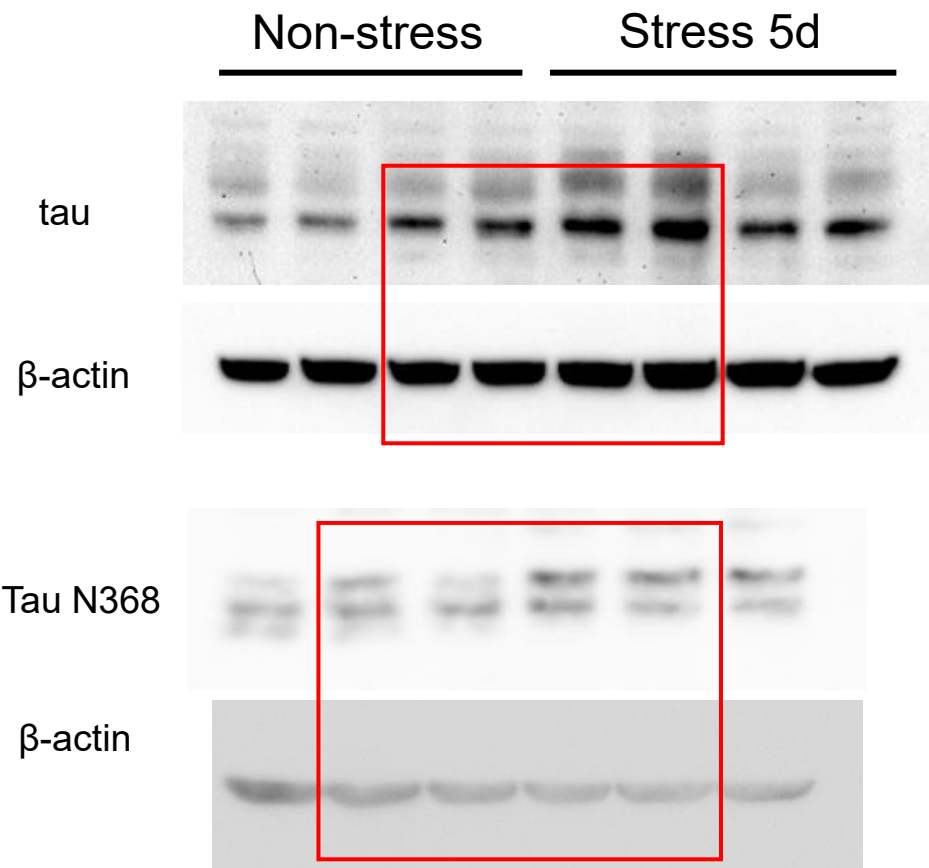

The highlighted images are shown in the figure.
