# Supplementary material for: Chronic stress impairs autoinhibition in neurons of the locus coeruleus to increase asparagine endopeptidase activity
Source: eLife. 2025 Oct 9;14:RP106362. doi: 10.7554/eLife.106362 (PMC12510684; doi:10.7554/eLife.106362)
Supplement: Figure 1—source data 1. [file elife-106362-fig1-data1.xlsx]

## Sheet: Fig. 1C
	Cumulative spike number												Cumulative spike number
		2020-0630 A		2020-0630 B		2020-0718 A		2020-0718 B		2020-0718 C				75 pA		100 pA
	Time from onset (ms)	75 pA	100 pA	75 pA	100 pA	75 pA	100 pA	75 pA	100 pA	75 pA	100 pA		Time from onset (ms)	mean	SD	mean	SD
	50	1	1	1	1	1	1	1	1	2	2		50	1.2	0.447214	1.2	0.447214
	100	2	2	2	2	2	2	2	3	3	3		100	2.2	0.447214	2.4	0.547723
	150	3	4	3	3	3	3	3	4	4	5		150	3.2	0.447214	3.6	0.83666
	200	4	5	3	4	4	4	4	5	5	6		200	4	0.707107	4.6	0.83666
	250	5	6	4	5	4	5	5	6	6	7		250	4.8	0.83666	5.6	0.83666
	300	6	7	5	6	5	6	5	7	7	9		300	5.6	0.894427	6.6	1.22474
	350	6	8	6	7	6	7	6	7	8	10		350	6.4	0.894427	7.4	1.30384
	400	7	9	7	8	6	7	7	8	9	11		400	7.2	1.09545	8.2	1.51658
	450	8	10	7	8	7	8	8	9	10	12		450	8	1.22474	9	1.67332
	500	8	11	8	9	7	9	8	10	11	13		500	8.4	1.51658	10	1.67332
	550	9	12	9	10	8	9	9	11	12	14		550	9.4	1.51658	10.8	1.92354
	600	10	13	10	11	8	10	10	11	13	15		600	10.2	1.78885	11.6	2
	650	10	14	10	11	9	10	10	12	13	16		650	10.4	1.51658	12	2.40832
	700	11	14	11	12	9	11	11	13	14	16		700	11.2	1.78885	12.8	1.92354
	750	12	15	11	12	10	12	11	13	15	17		750	11.8	1.92354	13.4	2.16795
	800	12	16	12	13	10	12	12	14	15	18		800	12.2	1.78885	14	2.40832
	850	13	17	12	13	10	13	12	15	16	19		850	12.6	2.19089	14.8	2.60768
	900	13	18	13	14	11	13	13	15	17	20		900	13.4	2.19089	15.4	2.91548
	950	14	18	13	15	11	14	13	16	17	20		950	13.6	2.19089	16	2.40832
	1000	14	19	14	15	12	14	14	16	18	21		1000	14.4	2.19089	16.4	2.91548

## Sheet: Fig. 1F
	Cumulative spike number
		2020-0601 A		2020-0601 B		2020-0602 A		2020-0602 B		2020-0603 A		2022-0105 A		2022-0119 A		2022-0120 A		2022-0121 A		2022-0121 B		Control		Atipamezole
	Time from onset (ms)	control	atipamezole	control	atipamezole	control	atipamezole	control	atipamezole	control	atipamezole	control	atipamezole	control	atipamezole	control	atipamezole	control	atipamezole	control	atipamezole	mean	SD	mean	SD
	50	2	2	2	2	2	2	2	2	2	2	2	2	1	1	2	2	2	2	2	2	1.9	0.316228	1.9	0.316228
	100	4	3	4	4	3	3	3	3	3	3	3	3	3	3	3	4	3	3	3	3	3.2	0.421637	3.2	0.421637
	150	5	5	6	6	5	5	5	5	4	4	4	4	4	4	5	5	4	5	4	4	4.6	0.699206	4.7	0.674949
	200	7	6	7	8	6	6	6	6	5	5	6	6	5	5	6	7	6	6	5	5	5.9	0.737865	6	0.942809
	250	8	8	8	9	8	8	7	7	6	6	7	7	6	7	7	8	7	8	6	6	7	0.816497	7.4	0.966092
	300	9	9	9	11	9	9	9	9	8	8	8	8	7	8	8	9	8	10	7	7	8.2	0.788811	8.8	1.13529
	350	10	10	11	12	10	11	10	10	9	9	9	10	8	9	10	10	9	11	8	8	9.4	0.966092	10	1.1547
	400	11	12	12	13	12	12	11	11	10	10	11	11	9	10	11	12	11	13	9	9	10.7	1.05935	11.3	1.33749
	450	13	13	13	15	13	14	12	13	11	11	12	12	10	11	12	13	12	14	10	10	11.8	1.13529	12.6	1.57762
	500	14	14	14	16	14	15	13	14	12	12	13	13	11	13	13	14	13	16	10	11	12.7	1.33749	13.8	1.61933
	550	15	15	15	17	15	16	13	15	13	14	14	15	12	14	14	15	14	17	11	12	13.6	1.3499	15	1.49071
	600	15	17	16	18	16	17	14	17	14	15	15	16	13	15	15	16	15	18	12	13	14.5	1.2693	16.2	1.54919
	650	16	18	17	20	17	18	15	18	15	16	16	17	14	16	16	18	16	20	13	14	15.5	1.2693	17.5	1.84089
	700	17	19	18	21	18	20	16	19	16	17	17	18	15	18	16	19	17	21	13	15	16.3	1.49443	18.7	1.82878
	750	18	20	18	22	19	21	17	21	17	18	18	19	15	19	17	20	18	23	14	15	17.1	1.52388	19.8	2.25093
	800	19	21	19	23	20	22	17	22	18	19	19	21	16	20	18	21	19	24	15	16	18	1.56347	20.9	2.23358
	850	20	22	20	24	20	23	18	23	19	20	19	22	17	21	19	22	20	25	15	17	18.7	1.63639	21.9	2.23358
	900	21	23	21	25	21	24	19	24	20	22	20	23	18	22	20	23	20	27	16	18	19.6	1.57762	23.1	2.33095
	950	22	24	22	26	22	25	20	26	20	23	21	24	19	23	20	24	21	28	17	19	20.4	1.57762	24.2	2.39444
	1000	22	25	22	27	23	26	20	27	21	24	22	25	19	24	21	25	22	29	17	20	20.9	1.79196	25.2	2.39444

## Sheet: Fig. 1G
	a	2020-0601 A	2020-0601 B	2020-0602 A	2020-0602 B	2020-0603 A	2022-0105 A	2022-0119 A	2022-0120 A	2022-0121 A	2022-0121 B		mean	SD
	control (pA)	57.01	50.46	63.44	46.7	86.1	71.96	73.63	55	74.92	43.7		62.292	13.982
	atipamezole (pA)	101.5	78.45	111.14	277.61	293.07	187.32	234.92	95.2	227.24	81.82		168.827	84.5986
	b	2020-0601 A	2020-0601 B	2020-0602 A	2020-0602 B	2020-0603 A	2022-0105 A	2022-0119 A	2022-0120 A	2022-0121 A	2022-0121 B		mean	SD
	control (pA)	1.59	1.29	1.78	1.34	3.06	2.29	2.82	1.63	2.4	1.57		1.977	0.62475
	atipamezole (pA)	3.06	1.93	3.26	9.34	11.3	6.47	8.7	2.83	6.78	3.19		5.686	3.28363

## Sheet: Fig. 1I
		200611 A	200619 A	200620 A	200622 A	200630 A	200718 A
	Inward component (pA)								mean	SD
	(2) - (1)	-88.9156	-49.115	-62.3777	-75.2351	-43.4762	-100.151		-69.8784	22.3249
	(3) - (1)	4.50106	-5.21267	-3.48708	-4.25397	2.7167	-1.9255		-1.27691	3.97473
	Outward component (pA)
	(2) - (1)	52.8517	36.0982	25.102	28.1581	29.2659	42.4253		35.6502	10.4895
	(3) - (1)	15.2039	13.314	3.80824	-14.3265	-0.0138454	0.581984		3.09463	10.6869
