# Supplementary material for: Chronic stress impairs autoinhibition in neurons of the locus coeruleus to increase asparagine endopeptidase activity
Source: eLife. 2025 Oct 9;14:RP106362. doi: 10.7554/eLife.106362 (PMC12510684; doi:10.7554/eLife.106362)
Supplement: Figure 2—source data 1. [file elife-106362-fig2-data1.xlsx]

## Sheet: Fig. 2E
	Inward current (pA)													Outward current (pA)
	min	2022-0519	2022-0525	2022-0526	2022-0530	2022-0531	2022-0601	2022-0602	2022-0606		Mean	SD		min	2022-0519	2022-0525	2022-0526	2022-0530	2022-0531	2022-0601	2022-0602	2022-0606		Mean	SD
	0	-69.922	-67.7471	-66.3567	-68.219	-85.2717	-123.506	-128.214	-118.103	0	-90.9174	27.5683		0	33.0552	56.7538	29.0727	29.346	53.9102	57.6563	70.5607	94.0806	0	53.0544	22.5591
	1	-55.103	-45.1783	-53.8381	-63.2066	-81.4414	-104.847	-117.385	-115.182	1	-79.5227	29.4034		1	26.4483	49.316	26.5226	25.5008	50.328	56.6738	50.8484	80.6372	1	45.7844	19.0802
	2	-41.0341	-51.8936	-59.1242	-60.4914	-73.3062	-120.241	-97.5845	-101.686	2	-75.6702	27.8218		2	16.2168	49.8279	24.7616	26.9808	43.1078	47.2717	49.2601	61.6577	2	39.8855	15.4973
	3	-33.6236	-39.4889	-55.5224	-52.0203	-90.3396	-90.8836	-80.5668	-96.4533	3	-67.3623	25.0503		3	21.0675	45.8737	20.568	19.7284	43.7575	51.6908	34.9674	52.9681	3	36.3277	14.2322
	4	-27.4892	-35.3649	-50.4192	-49.335	-61.7738	-83.3456	-86.869	-81.1894	4	-59.4733	22.6345		4	25.6175	47.8349	16.5425	22.7387	44.3576	37.6892	26.0554	38.306	4	32.3927	11.1812
	5	-26.1025	-32.2224	-50.0287	-41.8211	-55.2443	-66.4655	-72.0116	-67.9398	5	-51.4795	17.0775		5	16.036	47.4378	20.9635	16.6598	29.9014	33.4141	30.2952	36.0302	5	28.8423	10.6642
	6	-28.828	-25.3223	-46.3856	-34.0495	-60.0695	-67.8047	-76.8887	-38.7474	6	-47.262	19.0217		6	18.3634	46.3867	9.18532	16.1606	29.8191	23.4819	25.4158	26.002	6	24.3519	11.039
	7	-21.055	-26.1186	-35.7088	-24.2187	-41.6918	-46.5967	-59.3467	-42.3344	7	-37.1338	12.9806		7	19.9972	43.0865	14.2018	9.06057	10.3709	20.0168	9.31015	11.84	7	17.2355	11.3308
	8	-19.0707	-16.3686	-33.1879	-16.8948	-35.2218	-45.8768	-57.998	-22.957	8	-30.9469	15.0847		8	19.5632	32.5258	8.44924	5.40241	14.2634	23.2214	14.0858	4.3107	8	15.2277	9.6052
	9	-22.5978	-13.5504	-19.7324	-16.1117	-8.8045	-36.0581	-50.3718	-14.3454	9	-22.6965	13.8512		9	12.9204	26.3081	7.61706	2.07637	18.4155	23.1931	8.75018	-0.809519	9	12.3089	9.73641
	10	-16.7768	-17.7102	-13.7024	-8.19015	-0.954129	-24.937	-44.4305	-13.6042	10	-17.5382	12.9347		10	3.99282	23.931	2.66749	-1.97786	6.45634	13.1507	-0.324756	-6.96377	10	5.1165	9.66185
	11	-16.0854	-17.3269	-16.5824	0.429082	-14.2187	-22.3574	-29.3194	-15.0638	11	-16.3156	8.393		11	1.91461	18.6285	4.29508	1.35898	0.865219	10.1472	2.66038	0.297629	11	5.02095	6.32661
	12	-12.1646	-16.2488	-13.0009	0.11293	-5.27201	-20.9867	-25.6749	-10.6499	12	-12.9856	8.21919		12	-0.310095	17.606	4.17106	-4.7748	3.2667	6.3611	-1.6	0.970575	12	3.21132	6.78654
	13	-7.74878	-6.53522	-11.6461	-4.99184	2.57486	-21.2634	-24.8883	-8.23592	13	-10.3418	8.89377		13	2.12555	12.0985	5.54881	-1.67799	-0.930348	8.98362	2.37091	-2.74227	13	3.2221	5.29357
	14	-9.36941	1.41201	-11.4366	5.52133	6.79023	-14.6422	-14.7139	-14.1831	14	-6.3277	9.32663		14	4.36257	10.0053	5.26403	-7.75916	3.5736	6.03925	-20.4585	-6.37739	14	-0.668788	10.0849
	15	-7.15168	6.46956	-11.7295	0.556328	2.89117	-16.1212	-9.82811	-5.73714	15	-5.08132	7.76524		15	1.79975	9.21011	4.31895	-8.45937	-4.35383	10.262	-15.3858	-0.698477	15	-0.413333	8.76998
	16	-4.20985	9.77226	-8.89722	-4.73592	12.7995	-11.4968	0.513128	-14.2405	16	-2.56192	9.72008		16	5.35156	4.33095	3.34545	-6.33238	-2.71383	1.2583	-13.9639	-5.15879	16	-1.73533	6.60247
	17	-6.19639	6.01073	-8.21439	-2.94303	13.9875	-11.0371	0.904334	-14.7505	17	-2.77986	9.44687		17	1.54584	6.36942	3.41069	-7.8566	-4.25088	2.47176	-15.6508	-8.72665	17	-2.8359	7.53336
	18	-5.41493	16.5835	1.34924	8.48558	22.1282	-6.87771	-7.9292	-11.1512	18	2.14668	12.3374		18	-2.23135	-5.11512	2.00645	-4.54537	-5.15787	-1.62068	-17.0994	-10.2346	18	-5.49974	5.85807
	19	-12.7298	15.4786	1.34924	5.2498	21.7196	1.95267	1.16453	-9.86485	19	3.03997	11.5345		19	-5.39605	-8.83419	2.00645	-3.96981	-6.23593	-3.8407	-16.1288	-6.95638	19	-6.16943	5.13556
	20	-10.199	15.824	6.80433	0.0756139	22.759	4.07374	-3.23813	-9.45291	20	3.33083	11.6274		20	-2.23895	-3.65172	0.89737	-2.15004	-8.30494	-6.20386	-10.2693	-12.7795	20	-5.58762	4.63278

## Sheet: Fig. 2F
	Normalized amplitude
		2022-519	2022-525	2022-0526	2022-0530	2022-0531	2022-0601	2022-0602	2022-0606
	Inward component (%)									mean	SD
	before pulse train	100	100	100	100	100	100	100	100	100	0
	20 min after pulse train	14.5867	-23.3565	-10.2537	-0.110838	-26.6905	-3.29857	2.52557	8.00396	-6.65683	14.6224
	Outward component (%)
	before pulse train	100	100	100	100	100	100	100	100	100	0
	20 min after pulse train	-6.77337	-6.43432	3.08661	-7.32652	-15.4052	-10.7601	-14.5538	-10.8669	-8.30953	6.21905

## Sheet: Fig. 2J
	Inward current (pA)												Outward current (pA)
	min	2022-517	2022-608	2022-0610-1	2022-0610-2	2022-0611	2022-0613	2022-0614	2022-0615	Mean	SD		min	2022-517	2022-608	2022-0610-1	2022-0610-2	2022-0611	2022-0613	2022-0614	2022-0615	Mean	SD
	0	-50.5223	-138.108	-102.888	-45.4473	-86.9423	-99.8809	-86.3218	-107.654	-89.7206	30.3679		0	34.8811	86.7182	48.6599	52.2387	57.8193	81.2819	75.1318	91.5565	66.0359	20.4404
	1	-51.8423	-126.443	-97.8499	-41.3573	-85.6873	-93.4689	-85.1351	-98.1554	-84.9924	27.0767		1	33.489	81.1953	48.37	41.0039	55.2887	90.8985	75.9287	86.2715	64.0557	22.1599
	2	-48.2409	-138.083	-90.4354	-35.1682	-76.6254	-97.7165	-79.0535	-102.297	-83.4525	32.1359		2	34.4512	91.4059	45.4607	40.0453	55.214	85.2733	72.6326	88.4002	64.1104	23.1186
	3	-50.5526	-127.138	-102.391	-42.6683	-83.4774	-80.3313	-74.0225	-110.873	-83.9318	28.9373		3	34.9019	85.8764	46.2517	40.1586	55.9382	77.8155	69.5918	90.9979	62.6915	21.4176
	4	-48.1184	-119.997	-93.801	-36.7086	-85.3559	-72.0195	-76.1706	-105.375	-79.6933	27.8542		4	29.0743	83.7319	44.4172	40.0985	55.0862	67.5005	69.925	82.9829	59.1021	20.2102
	5	-50.306	-103.465	-86.0753	-32.7241	-81.5122	-83.7242	-73.1539	-98.0784	-76.1299	23.8276		5	27.2475	68.9348	42.9436	41.6615	59.3011	71.6751	72.0474	84.1484	58.4949	19.3713
	6	-47.4231	-103.164	-88.1762	-31.272	-77.6721	-82.4838	-75.609	-89.4026	-74.4003	23.6266		6	28.9474	69.8581	42.8005	47.6064	62.0721	73.8346	70.0834	83.8782	59.8851	18.4325
	7	-55.1297	-105.055	-83.2125	-33.4889	-70.943	-86.1042	-73.5106	-95.5486	-75.3741	22.8406		7	27.7065	74.4629	40.9782	44.7518	57.5425	71.7178	67.1922	83.4533	58.4756	19.1719
	8	-54.3093	-105.084	-81.4362	-33.3618	-80.6929	-73.8101	-68.4046	-94.3705	-73.9337	22.5254		8	29.52	77.2846	43.2915	38.6207	58.7621	55.1198	65.6342	80.3327	56.0707	18.17
	9	-43.9502	-97.3167	-74.079	-39.5729	-75.3011	-81.4856	-72.0518	-92.0507	-71.976	20.6552		9	34.5688	75.2691	42.3973	46.8766	56.3948	60.945	69.1583	83.4932	58.6379	16.8897
	10	-42.9597	-94.9941	-89.9905	-33.1365	-69.1799	-71.5925	-66.29	-91.504	-69.9559	22.6583		10	29.5145	75.2708	43.4042	45.1791	52.8597	54.037	65.4836	75.7778	55.1908	16.2048
	11	-43.6578	-84.2591	-69.698	-32.3061	-78.194	-83.6024	-67.8574	-92.0675	-68.9553	20.8846		11	29.7058	69.4378	42.9581	45.2232	52.3688	68.0551	65.8168	80.6239	56.7737	16.9647
	12	-45.3898	-83.9041	-72.1927	-29.2714	-71.7904	-89.3221	-61.8996	-89.4635	-67.9042	21.5422		12	31.6917	67.7827	42.5106	43.1563	52.4457	69.8148	66.0694	81.3778	56.8561	16.9861
	13	-38.0381	-88.8564	-69.7519	-35.2872	-74.874	-89.6721	-58.4909	-96.5188	-68.9362	23.3592		13	32.6069	77.0875	44.2512	44.1516	51.6129	58.5591	67.4447	77.2226	56.6171	16.364
	14	-37.0018	-92.2075	-68.5323	-37.0117	-75.1043	-93.2582	-61.4158	-96.2892	-70.1026	23.917		14	31.9624	79.3588	42.6874	43.3927	51.4376	62.6479	65.7149	69.5474	55.8436	16.0461
	15	-38.5757	-92.7394	-71.1132	-39.3289	-71.022	-69.5542	-60.9974	-108.451	-68.9727	23.9011		15	32.6179	79.616	42.7056	44.2398	40.3746	46.7087	61.9595	86.4864	54.3386	19.6135
	16	-42.001	-91.4872	-69.1047	-40.0682	-65.9985	-69.9782	-60.7202	-101.563	-67.6151	21.3649		16	30.265	78.97	42.5295	42.5743	51.1188	56.909	61.395	87.3824	56.393	19.2316
	17	-40.65	-89.8081	-76.9644	-39.1151	-68.3474	-67.8635	-60.2498	-96.6448	-67.4554	20.7594		17	30.7961	81.6513	40.0892	41.6213	47.874	65.716	60.2101	78.827	55.8481	18.7166
	18	-37.26	-87.8771	-77.5823	-38.916	-68.404	-80.5525	-65.1728	-97.7809	-69.1932	21.7748		18	27.1626	83	42.2311	43.4141	47.9945	63.7726	63.9632	81.0943	56.579	19.725
	19	-38.2856	-82.2037	-71.6784	-34.1074	-64.9122	-69.9129	-64.9678	-112.71	-67.3472	24.6834		19	28.6529	81.5523	41.6622	37.5012	49.7608	61.9953	66.9525	89.5055	57.1978	21.5623
	20	-37.4141	-87.6057	-68.9145	-37.5733	-62.9668	-77.9093	-68.0792	-90.2398	-66.3378	20.1514		20	26.2279	81.6838	42.7538	37.4822	42.5505	71.778	59.6232	79.6222	55.2152	20.9095

## Sheet: Fig. 2K
	Normalized amplitude
		2022-517	2022-608	2022-0610-1	2022-0610-2	2022-0611	2022-0613	2022-0614	2022-0615	mean	SD
	Inward component (%)
	before pulse train	100	100	100	100	100	100	100	100	100	0
	20 min after pulse train	63.4327	74.0546	66.9801	82.6744	72.4237	78.0022	78.8668	83.8236	75.0323	7.23445
	Outward component (%)
	before pulse train	100	100	100	100	100	100	100	100	100	0
	20 min after pulse train	75.1923	94.1945	87.8625	71.7518	73.5922	88.3075	79.3581	86.9651	82.153	8.24938
