# Supplementary material for: Chronic stress impairs autoinhibition in neurons of the locus coeruleus to increase asparagine endopeptidase activity
Source: eLife. 2025 Oct 9;14:RP106362. doi: 10.7554/eLife.106362 (PMC12510684; doi:10.7554/eLife.106362)
Supplement: Figure 3—source data 3. [file elife-106362-fig3-data3.xlsx]

## Sheet: Fig. 3C
	Relative protein level
		Non stress	stress 3d
	1	2.01749	1.04964
	2	2.30945	1.0992
	3	1.77967	1.18795
	4	1.41998	0.895472
	5	1.61912	1.00422
	6	1.72776	0.88792
	7		0.897571
	8
	Mean	1.81225	1.00314
	SD	0.285398	0.107941

## Sheet: Fig. 3F
	Relative protein level		membrane
		Non stress	stress 5d
	1	0.937453	0.377561
	2	0.778321	0.450897
	3	0.937969	0.547788
	4
	5
	Mean	0.884581	0.458749
	SD	0.0751374	0.0697163

## Sheet: Fig. 3G
	Relative protein level		cytosol
		Non stress	stress 5d
	1	0.812699	0.639516
	2	0.693471	0.784697
	3	0.667284	0.777544
	4
	5
	Mean	0.724485	0.733919
	SD	0.0632868	0.0668172
