# Supplementary material for: Chronic stress impairs autoinhibition in neurons of the locus coeruleus to increase asparagine endopeptidase activity
Source: eLife. 2025 Oct 9;14:RP106362. doi: 10.7554/eLife.106362 (PMC12510684; doi:10.7554/eLife.106362)
Supplement: Figure 4—source data 1. [file elife-106362-fig4-data1.xlsx]

## Sheet: Fig. 4F and G
	Non stress	200924A	200924B	210612A	210612B	210825A	210825B	210828A	210828B	210901A		mean	SD
	inward component (pA)	-222.343	-100.08	-139.342	-114.547	-177.721	-203.344	-100.161	-150.893	-96.7889		-145.024	47.1744
	outward component (pA)	137.079	47.3415	61.6706	56.98	107.816	98.0971	74.7636	65.178	44.1327		77.0065	31.114
	RS 1 days	200923A	200923B	210613A	210613B	210908A	210908B	210911A				mean	SD
	inward component (pA)	-115.057	-113.607	-128.642	-69.6294	-69.4283	-63.2352	-63.271				-88.9814	28.6939
	outward component (pA)	62.2834	66.0781	70.8172	30.7511	42.0209	38.6939	48.4884				51.3047	15.2486
	RS 2 days	200925A	200925B	210908A	210908B	210911A						mean	SD
	inward component (pA)	-63.8336	-71.4	-63.2033	-68.3245	-86.9968						-70.7516	9.68315
	outward component (pA)	39.76	32.6629	36.0056	49.9347	62.4023						44.1531	12.0848
	RS 3 days	201002A	201002B	201002C	201002D	201009A	201009B	201009C				mean	SD
	inward component (pA)	-70.25	-101.861	-43.1315	-88.7472	-53.679	-65.412	-70.259				-70.4771	19.8934
	outward component (pA)	75.7082	41.1679	13.4249	35.7326	28.7	38.882	35.87				38.4979	18.8463
	RS 5 days	201010A	201010B	201010C	201010D	201017A	201017B	201017C	201017D			mean	SD
	inward component (pA)	-44.3685	-99.5225	-55.9714	-59.3827	-57.4969	-71.958	-43.4589	-82.6			-64.3449	19.2932
	outward component (pA)	28.5319	55.7633	25.8681	30.6306	22.5417	25.0032	26.6339	39.9913			31.8705	11.0009

## Sheet: Fig. 4H
	Relative mRNA level
		Alpha 2A	Alpha 2C
	1	1.84668	0.187941
	2	1.21336	0.151907
	3	0.482355	0.0928345
	4	1.12624	0.170805
	5	0.821526	0.250135
	Mean	1.09803	0.170724
	SD	0.453892	0.0510361

## Sheet: Fig. 4I
	Relative mRNA level
		GIRK1	GIRK2	GIRK3
	1	0.837411	0.380986	0.240735
	2	0.742592	0.38757	0.216597
	3	1.32373	1.03195	0.0465893
	4	1.03341	0.411283	0.0297381
	5	1.17554	0.634843	0.0152458
	Mean	1.02254	0.569327	0.109781
	SD	0.213018	0.24972	0.097873

## Sheet: Fig. 4J
	Relative mRNA level
		Alpha 2A
		Non stress	stress 3d
	1	1.33815	0.0956993
	2	0.879229	0.115801
	3	0.349526	0.325138
	4	0.816099	0.137303
	5	0.595297	0.031399
	6	3.33848	0.42848
	7	1.30597
	8	1.14803
	Mean	1.22135	0.18897
	SD	0.861808	0.139915

## Sheet: Fig. 4K
	Relative mRNA level
		GIRK1
		Non stress	stress 3d
	1	0.565911	0.0307929
	2	0.501834	0.236129
	3	0.894556	0.350083
	4	0.698368	0.299416
	5	0.794417	0.0678757
	6	2.90469	0.209438
	7	1.50509
	8	1.62288
	Mean	1.18597	0.198956
	SD	0.756244	0.115386

## Sheet: Fig. 4L
	Normalized relative mRNA level
		GIRK2
		Non stress	stress 3d
	1	0.463639	0.0351982
	2	0.471651	0.245876
	3	0.500509	0.28053
	4	0.772569	0.0305578
	5	0.513357	0.21346
	6	1.09026	0.243546
	7	0.434523
	8	0.445677
	Mean	0.586523	0.174861
	SD	0.215742	0.102263
