# Supplementary material for: Chronic stress impairs autoinhibition in neurons of the locus coeruleus to increase asparagine endopeptidase activity
Source: eLife. 2025 Oct 9;14:RP106362. doi: 10.7554/eLife.106362 (PMC12510684; doi:10.7554/eLife.106362)
Supplement: Figure 5—source data 3. [file elife-106362-fig5-data3.xlsx]

## Sheet: Fig. 5B-I
	Western TH level				Western MAO-A level				Western pro-AEP level				Western active-AEP level				Western tau level				Western N-368 level
		Non stress	stress 5d			Non stress	stress 5d			Non stress	stress 5d			Non stress	stress 5d			Non stress	stress 5d			Non stress	stress 5d
	1	0.845241	1.29724		1	0.311489	1.81449		1	0.616385	0.915842		1	0.804957	0.933231		1	1.00404	1.09917		1	0.645725	2.86861
	2	1.12778	1.03451		2	0.974766	2.25346		2	0.813945	1.17472		2	0.878534	1.06582		2	0.98767	1.03503		2	1.13041	2.40649
	3	0.275831	1.03388		3	2.18661	5.87955		3	1.12145	1.41482		3	0.952168	1.39316		3	1.03661	1.05158		3	1.22386	1.97338
	4	0.703785	1.59655		4	0.269978	1.48434		4	1.28578	1.93706		4	1.05201	1.63747		4	0.971763	1.11704		4	0.846657	2.28244
	5	1.17591	0.521688		5	0.774902	2.7077		5	1.02285	2.11939		5	1.12113	2.0404		5	0.760247	1.6216		5	1.26971	1.32819
	6	1.33981	1.2463		6	1.48226	4.1783		6	1.13959	2.12823		6	1.1912	2.19458		6	0.889224	1.81013		6	0.883638	0.929616
	7	0.599968	0.829637		7				7				7				7	1.25874	1.22382		7
	8	1.51583	1.22551		8				8				8				8	1.09121	1.48543		8
	9	1.77631	1.39164		9				9				9				9				9
	10	0.639558	1.50304		10				10				10				10				10
	Mean	1	1.168		Mean	1	3.05297		Mean	1	1.61501		Mean	1	1.54411		Mean	0.999938	1.30547		Mean	1	1.96479
	SD	0.44244	0.306608		SD	0.670683	1.52801		SD	0.222937	0.473336		SD	0.134795	0.465985		SD	0.135703	0.275981		SD	0.22451	0.656991
